# Supplementary material for: Long-term ambient hydrocarbon exposure and incidence of urinary bladder cancer
Source: bioRxiv or medRxiv preprint supplement (doi:10.1101/2022.05.08.22274798), 2022-05-10
Supplement: Supplementary file [file media-1.pdf]

## Supplementary Information

### **Long-term ambient hydrocarbon exposure and incidence of urinary bladder cancer**

Han-Wei Zhang, PhD, Zhi-Ren Tsai, PhD, Victor C. Kok, MD, PhD, FACP, Hsiao-Ching Peng, MSc, Yau-Hung Chen, PhD, Jeffrey J.P. Tsai, PhD, and Chun-Yi Hsu, PhD

Corresponding Author: Victor C. Kok, [vkok@alumni.harvard.edu](mailto:vkok@alumni.harvard.edu)

Supplementary Figures: 2.

Supplementary Tables: 4.

## Legends of Figures and Tables

**Supplementary Figure S1.** Population distribution of the daily average concentrations of air pollutants (SO<sub>2</sub>, CO<sub>2</sub>, CO, O<sub>3</sub>, PM<sub>10</sub>, and PM<sub>2.5</sub>) over a 10-year exposure period.

**Supplementary Figure S2.** Population distribution of the daily average concentrations of air pollutants (NO<sub>x</sub>, NO, NO<sub>2</sub>, THC, NMHC, and CH<sub>4</sub>) over a 10-year exposure period.

**Supplementary Table S1.** Pearson's correlation analysis for air pollutants over a 10-year exposure period. CO<sub>2</sub>, carbon dioxide; CO, carbon monoxide; CH<sub>4</sub>, methane; NMHC, nonmethane hydrocarbons; NO, nitrogen monoxide; NO<sub>2</sub>, nitrogen dioxide; NO<sub>x</sub>, nitrogen oxides; O<sub>3</sub>, ozone; PM<sub>10</sub>, particulate matter <10 µm in size; PM<sub>2.5</sub>, particulate matter <2.5 µm in size; SO<sub>2</sub>, sulfur dioxide; THC, total hydrocarbons. †Correlation significant at the 0.01 level (two-tailed). Correlation coefficient values of <0.3 denote a low strength of correlation, which qualifies as the controlling pollutant in multiple-pollutant models of targeted pollutants.

**Supplementary Table S2.** Mean and distribution of air pollutants over a 10-year exposure period. SD, standard deviation; 5th, 5 percentile; 95th, 95 percentile; Min, minimum; Max, maximum; IQR, interquartile range; T<sub>1</sub>, 33.33 percentile; T<sub>2</sub>, 66.66 percentile; ppb, parts per billion; ppm, parts per million; µg/m<sup>3</sup>, microgram/cubic meter; CO<sub>2</sub>, carbon dioxide; CO, carbon monoxide; CH<sub>4</sub>, methane; NMHC, nonmethane hydrocarbons; NO, nitrogen monoxide; NO<sub>2</sub>, nitrogen dioxide; NO<sub>x</sub>, nitrogen oxides; O<sub>3</sub>, ozone; PM<sub>10</sub>, particulate matter <10 µm in size; PM<sub>2.5</sub>, particulate matter <2.5 µm in size; SO<sub>2</sub>, sulfur dioxide; THC, total hydrocarbons.

**Supplementary Table S3.** Sensitivity analysis showing adjusted hazard ratios of developing urinary bladder cancer stratified by sex during long-term THC or NMHC exposure at a standard deviation (SD) increment controlled for PM<sub>2.5</sub>, and other air pollutants

**Supplementary Table S4.** Sensitivity analysis showing adjusted hazard ratios of the incidence of urinary bladder cancer stratified by diabetes mellitus status during long-term THC or NMHC exposure at a standard deviation (SD) increment controlled for PM<sub>2.5</sub>, and other air pollutants.

**Supplementary Figure S1.** Population distribution of the daily average concentrations of air pollutants (SO<sub>2</sub>, CO<sub>2</sub>, CO, O<sub>3</sub>, PM<sub>10</sub>, and PM<sub>2.5</sub>) over a 10-year exposure period.

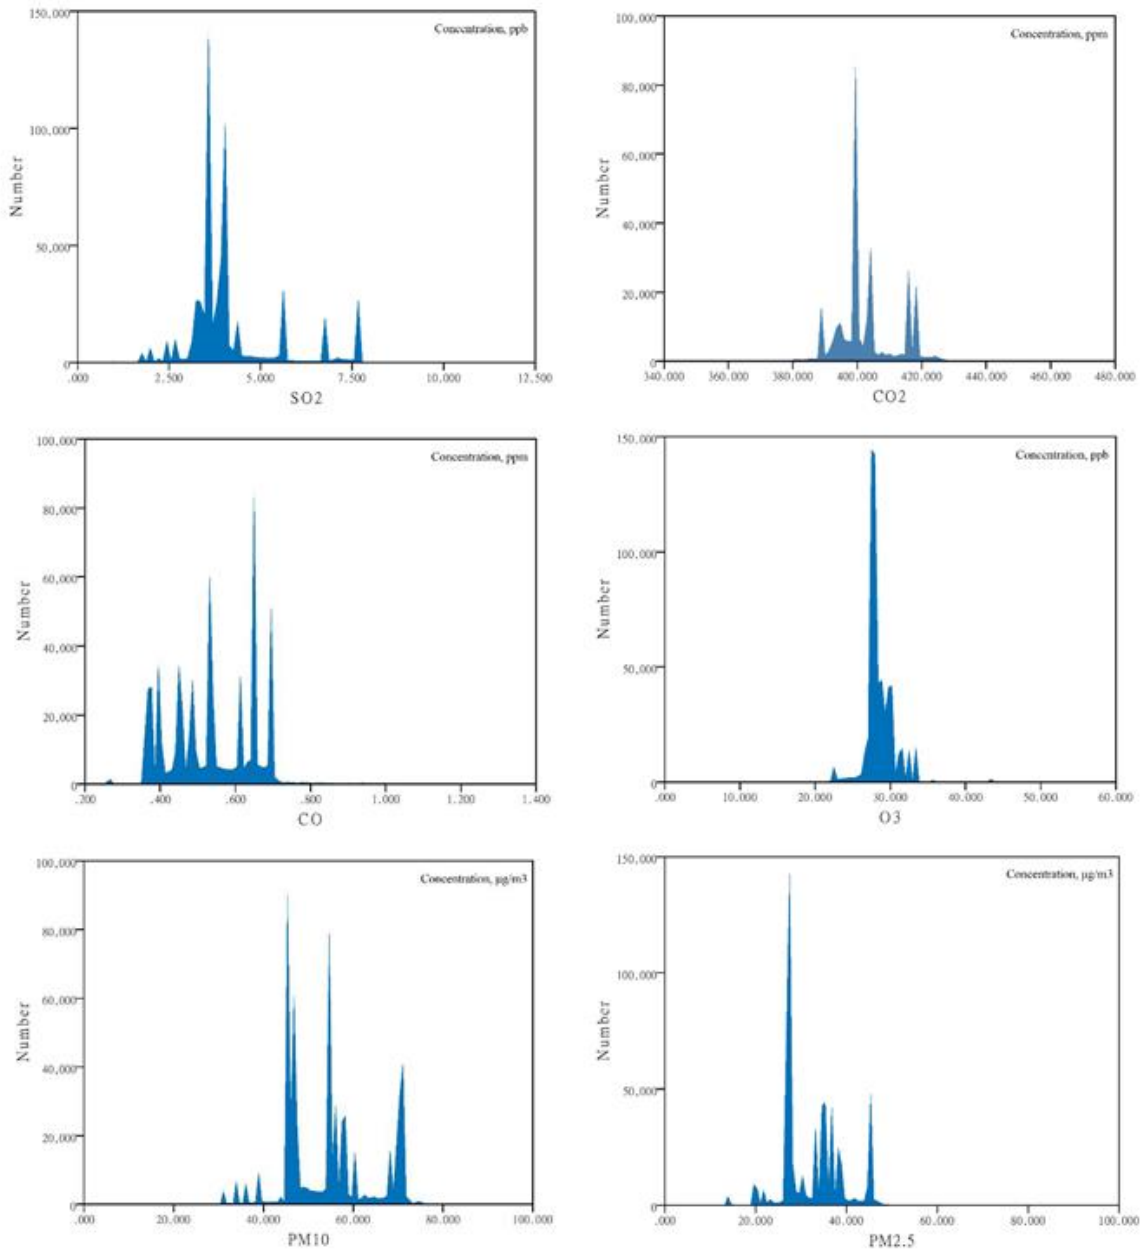

**Supplementary Figure S2.** Population distribution of the daily average concentrations of air pollutants (NO<sub>x</sub>, NO, NO<sub>2</sub>, THC, NMHC, and CH<sub>4</sub>) over a 10-year exposure period.

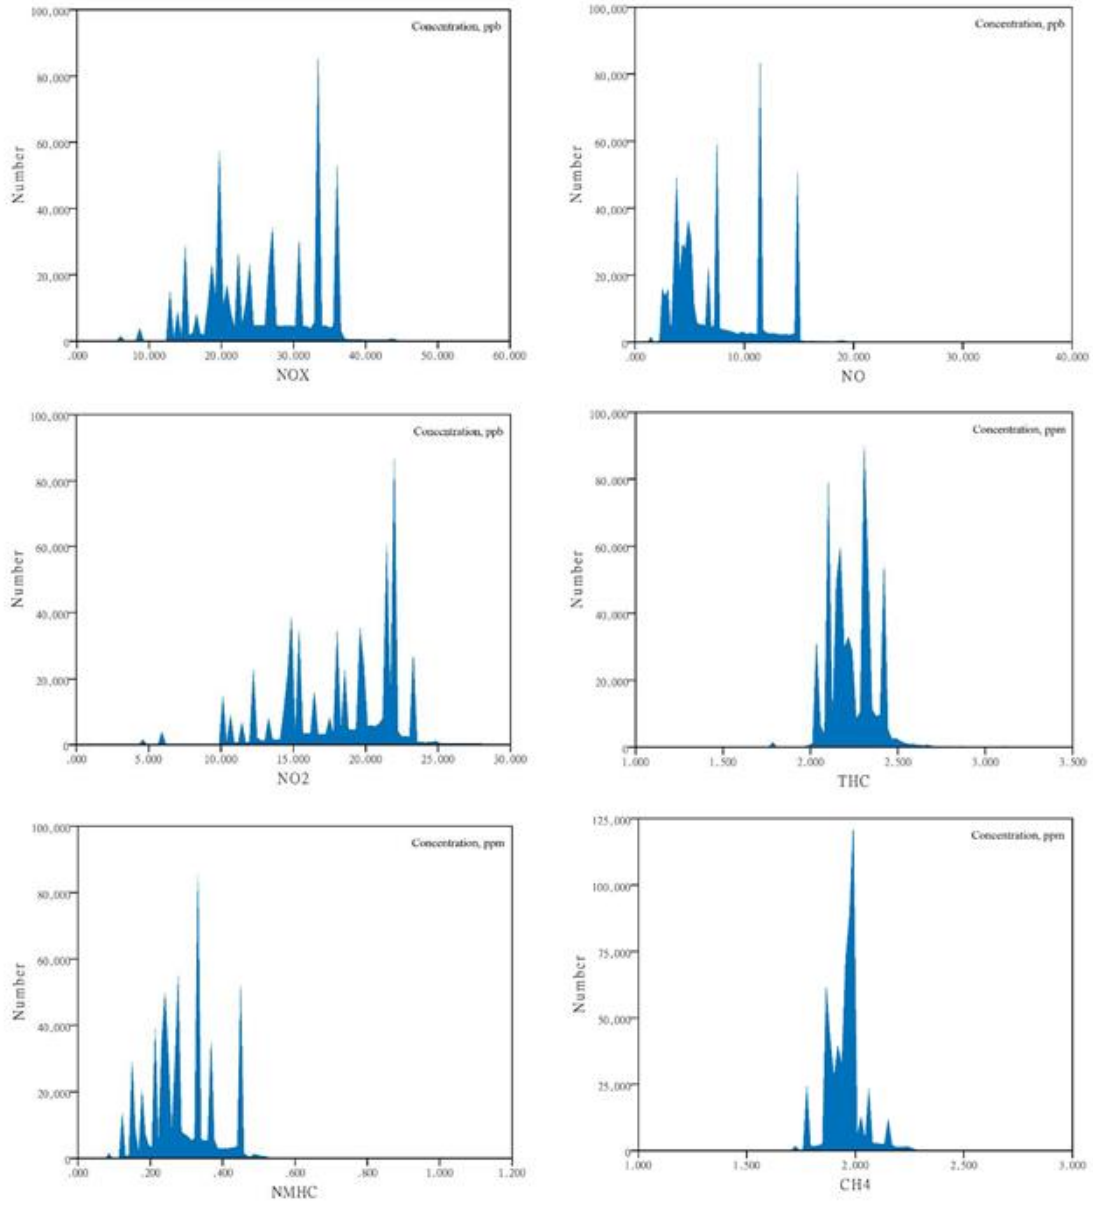

**Supplementary Table S1.** Pearson's correlation analysis for air pollutants over a 10-year exposure period.

|                   | SO <sub>2</sub> | CO <sub>2</sub>           | CO                        | O <sub>3</sub>             | PM <sub>10</sub>    | PM <sub>2.5</sub>          | NO <sub>x</sub>            | NO                        | NO <sub>2</sub>            | THC                        | NMHC                      | CH <sub>4</sub>            |
|-------------------|-----------------|---------------------------|---------------------------|----------------------------|---------------------|----------------------------|----------------------------|---------------------------|----------------------------|----------------------------|---------------------------|----------------------------|
| SO <sub>2</sub>   | 1               | <b>0.098</b> <sup>†</sup> | <b>0.186</b> <sup>†</sup> | <b>0.059</b> <sup>†</sup>  | 0.621 <sup>†</sup>  | 0.613 <sup>†</sup>         | <b>0.272</b> <sup>†</sup>  | <b>0.073</b> <sup>†</sup> | 0.449 <sup>†</sup>         | <b>0.089</b> <sup>†</sup>  | <b>0.156</b> <sup>†</sup> | <b>-0.050</b> <sup>†</sup> |
| CO <sub>2</sub>   |                 | 1                         | -0.328 <sup>†</sup>       | <b>-0.006</b> <sup>†</sup> | 0.527 <sup>†</sup>  | 0.413 <sup>†</sup>         | <b>-0.274</b> <sup>†</sup> | -0.377 <sup>†</sup>       | <b>-0.154</b> <sup>†</sup> | -0.545 <sup>†</sup>        | -0.474 <sup>†</sup>       | -0.372 <sup>†</sup>        |
| CO                |                 |                           | 1                         | -0.602 <sup>†</sup>        | -0.319 <sup>†</sup> | <b>-0.231</b> <sup>†</sup> | 0.945 <sup>†</sup>         | 0.923 <sup>†</sup>        | 0.867 <sup>†</sup>         | 0.643 <sup>†</sup>         | 0.870 <sup>†</sup>        | <b>0.095</b> <sup>†</sup>  |
| O <sub>3</sub>    |                 |                           |                           | 1                          | 0.402 <sup>†</sup>  | 0.358 <sup>†</sup>         | -0.494 <sup>†</sup>        | -0.460 <sup>†</sup>       | -0.478 <sup>†</sup>        | <b>-0.296</b> <sup>†</sup> | -0.481 <sup>†</sup>       | <b>-0.019</b> <sup>†</sup> |
| PM <sub>10</sub>  |                 |                           |                           |                            | 1                   | 0.936 <sup>†</sup>         | <b>-0.242</b> <sup>†</sup> | -0.427 <sup>†</sup>       | <b>-0.026</b> <sup>†</sup> | <b>-0.223</b> <sup>†</sup> | -0.373 <sup>†</sup>       | <b>0.020</b> <sup>†</sup>  |
| PM <sub>2.5</sub> |                 |                           |                           |                            |                     | 1                          | <b>-0.184</b> <sup>†</sup> | -0.387 <sup>†</sup>       | <b>0.045</b> <sup>†</sup>  | <b>-0.279</b> <sup>†</sup> | -0.349 <sup>†</sup>       | <b>-0.094</b> <sup>†</sup> |
| NO <sub>x</sub>   |                 |                           |                           |                            |                     |                            | 1                          | 0.949 <sup>†</sup>        | 0.946 <sup>†</sup>         | 0.679 <sup>†</sup>         | 0.831 <sup>†</sup>        | <b>0.154</b> <sup>†</sup>  |
| NO                |                 |                           |                           |                            |                     |                            |                            | 1                         | 0.795 <sup>†</sup>         | 0.752 <sup>†</sup>         | 0.879 <sup>†</sup>        | <b>0.231</b> <sup>†</sup>  |
| NO <sub>2</sub>   |                 |                           |                           |                            |                     |                            |                            |                           | 1                          | 0.529 <sup>†</sup>         | 0.692 <sup>†</sup>        | <b>0.056</b> <sup>†</sup>  |
| THC               |                 |                           |                           |                            |                     |                            |                            |                           |                            | 1                          | 0.750 <sup>†</sup>        | 0.743 <sup>†</sup>         |
| NMHC              |                 |                           |                           |                            |                     |                            |                            |                           |                            |                            | 1                         | <b>0.142</b> <sup>†</sup>  |
| CH <sub>4</sub>   |                 |                           |                           |                            |                     |                            |                            |                           |                            |                            |                           | 1                          |

CO<sub>2</sub>, carbon dioxide; CO, carbon monoxide; CH<sub>4</sub>, methane; NMHC, nonmethane hydrocarbons; NO, nitrogen monoxide; NO<sub>2</sub>, nitrogen dioxide; NO<sub>x</sub>, nitrogen oxides; O<sub>3</sub>, ozone; PM<sub>10</sub>, particulate matter < 10 µm in size; PM<sub>2.5</sub>, particulate matter < 2.5 µm in size; SO<sub>2</sub>, sulfur dioxide; THC, total hydrocarbons.

<sup>†</sup>Correlation significant at the 0.01 level (two-tailed).

Correlation coefficient values of < 0.3 denote a low strength of correlation, which qualifies as the controlling pollutant in multiple-pollutant models of targeted pollutants.

**Supplementary Table S2.** Mean and distribution of air pollutants over a 10-year exposure period.

|                                           | Mean   | SD    | Median | 5th    | 95th   | Min    | Max    | IQR   | T <sub>1</sub> / T <sub>2</sub><br>cutoff | T <sub>2</sub> / T <sub>3</sub><br>cutoff |
|-------------------------------------------|--------|-------|--------|--------|--------|--------|--------|-------|-------------------------------------------|-------------------------------------------|
| SO <sub>2</sub> (ppb)                     | 4.17   | 1.29  | 3.85   | 2.69   | 7.63   | 12.10  | 0.50   | 0.58  | 3.54                                      | 4.04                                      |
| CO <sub>2</sub> (ppm)                     | 402.75 | 9.55  | 398.96 | 388.45 | 418.07 | 463.65 | 343.47 | 8.61  | 398.96                                    | 404.31                                    |
| CO (ppm)                                  | 0.54   | 0.12  | 0.53   | 0.37   | 0.69   | 1.32   | 0.25   | 0.20  | 0.47                                      | 0.61                                      |
| O <sub>3</sub> (ppb)                      | 28.52  | 2.10  | 27.98  | 26.63  | 32.29  | 52.36  | 1.00   | 1.99  | 27.75                                     | 28.80                                     |
| PM <sub>10</sub> (µg/m <sup>3</sup> )     | 54.47  | 10.02 | 54.54  | 40.02  | 70.75  | 85.20  | 1.00   | 14.03 | 46.72                                     | 57.50                                     |
| PM <sub>2.5</sub><br>(µg/m <sup>3</sup> ) | 32.44  | 6.81  | 32.32  | 23.02  | 45.49  | 89.43  | 0.64   | 9.38  | 27.45                                     | 35.13                                     |
| NO <sub>x</sub> (ppb)                     | 25.78  | 7.52  | 25.98  | 14.11  | 36.22  | 58.53  | 1.00   | 13.86 | 20.59                                     | 30.74                                     |
| NO (ppb)                                  | 7.55   | 4.04  | 6.72   | 2.85   | 14.88  | 30.25  | 0.08   | 7.27  | 4.79                                      | 8.41                                      |
| NO <sub>2</sub> (ppb)                     | 18.23  | 3.90  | 19.17  | 10.68  | 23.16  | 29.50  | 1.00   | 6.29  | 16.55                                     | 21.35                                     |
| THC (ppm)                                 | 2.24   | 0.14  | 2.23   | 2.03   | 2.41   | 3.35   | 1.00   | 0.18  | 2.17                                      | 2.32                                      |
| NMHC<br>(ppm)                             | 0.29   | 0.09  | 0.27   | 0.15   | 0.45   | 1.09   | 0.06   | 0.10  | 0.24                                      | 0.33                                      |
| CH <sub>4</sub> (ppm)                     | 1.95   | 0.08  | 1.96   | 1.82   | 2.08   | 2.77   | 1.00   | 0.09  | 1.92                                      | 1.98                                      |

SD, standard deviation; 5th, 5 percentile; 95th, 95 percentile; Min, minimum; Max, maximum; IQR, interquartile range; T<sub>1</sub>, 33.33 percentile; T<sub>2</sub>, 66.66 percentile; ppb, parts per billion; ppm, parts per million; µg/m<sup>3</sup>, microgram/cubic meter; CO<sub>2</sub>, carbon dioxide; CO, carbon monoxide; CH<sub>4</sub>, methane; NMHC, nonmethane hydrocarbons; NO, nitrogen monoxide; NO<sub>2</sub>, nitrogen dioxide; NO<sub>x</sub>, nitrogen oxides; O<sub>3</sub>, ozone; PM<sub>10</sub>, particulate matter < 10 µm in size; PM<sub>2.5</sub>, particulate matter < 2.5 µm in size; SO<sub>2</sub>, sulfur dioxide; THC, total hydrocarbons.

**Supplementary Table S3.** Sensitivity analysis showing adjusted hazard ratios of developing urinary bladder cancer stratified by sex during long-term THC or NMHC exposure at a standard deviation (SD) increment controlled for PM<sub>2.5</sub>, and other air pollutants

| Ambient pollutant category  | Controlling pollutant <sup>a</sup> | Adjusted HR <sup>b</sup> (95% CI) |                               |
|-----------------------------|------------------------------------|-----------------------------------|-------------------------------|
|                             |                                    | Male<br>(n = 305,071)             | Female<br>(n = 303,158)       |
| THC<br>(0.14 ppm increase)  | -                                  | 1.72 (1.62–1.83) <sup>‡</sup>     | 1.88 (1.72–2.05) <sup>‡</sup> |
|                             | SO <sub>2</sub>                    | 1.70 (1.60–1.81) <sup>‡</sup>     | 1.87 (1.71–2.04) <sup>‡</sup> |
|                             | O <sub>3</sub>                     | 1.57 (1.48–1.66) <sup>‡</sup>     | 1.72 (1.58–1.87) <sup>‡</sup> |
|                             | PM <sub>10</sub>                   | 1.96 (1.84–2.09) <sup>‡</sup>     | 2.10 (1.91–2.30) <sup>‡</sup> |
|                             | PM <sub>2.5</sub>                  | 2.07 (1.94–2.21) <sup>‡</sup>     | 2.26 (2.06–2.49) <sup>‡</sup> |
|                             | SO <sub>2</sub> , O <sub>3</sub>   | 1.53 (1.44–1.62) <sup>‡</sup>     | 1.75 (1.60–1.91) <sup>‡</sup> |
| NMHC<br>(0.09 ppm increase) | -                                  | 1.33 (1.26–1.41) <sup>‡</sup>     | 1.47 (1.35–1.59) <sup>‡</sup> |
|                             | SO <sub>2</sub>                    | 1.31 (1.24–1.39) <sup>‡</sup>     | 1.47 (1.36–1.59) <sup>‡</sup> |
|                             | CH <sub>4</sub>                    | 1.17 (1.11–1.23) <sup>‡</sup>     | 1.25 (1.16–1.35) <sup>‡</sup> |
|                             | SO <sub>2</sub> , CH <sub>4</sub>  | 1.12 (1.06–1.19) <sup>‡</sup>     | 1.23 (1.14–1.33) <sup>‡</sup> |

HR, hazard ratio; CI, confidence interval; SO<sub>2</sub>, sulfur dioxide; O<sub>3</sub>, ozone; PM<sub>10</sub>, particulate matter < 10 µm in size; PM<sub>2.5</sub>, particulate matter < 2.5 µm in size; CH<sub>4</sub>, methane.

<sup>a</sup> Additional pollutants were added into the pollutant models for multiple analysis only when |Pearson's correlation coefficient| < 0.3 (Suppl Table S1).

<sup>b</sup> Cox regression models were adjusted for age, gender, essential hypertension, chronic cystitis, smoking-related diagnoses, alcohol use disorders, morbid obesity, spinal cord injury, chronic liver disease, diabetes mellitus, gout, chronic kidney disease, pesticide exposures, dyslipidemia, lag0-2, season, and ambient temperature, controlled pollutants (weak correlation with THC or NMHC).

<sup>‡</sup>p < 0.001.

**Supplementary Table S4.** Sensitivity analysis showing adjusted hazard ratios of the incidence of urinary bladder cancer stratified by diabetes mellitus status during long-term THC or NMHC exposure at a standard deviation (SD) increment controlled for PM<sub>2.5</sub>, and other air pollutants.

| Air pollutant category      | Controlling pollutant <sup>a</sup> | Adjusted HR <sup>b</sup> (95% CI)  |                                        |
|-----------------------------|------------------------------------|------------------------------------|----------------------------------------|
|                             |                                    | Diabetes mellitus<br>(n = 103,317) | Non-diabetes mellitus<br>(n = 504,912) |
| THC<br>(0.14 ppm increase)  | -                                  | 2.03 (1.82–2.26) <sup>‡</sup>      | 1.71 (1.61–1.81) <sup>‡</sup>          |
|                             | SO <sub>2</sub>                    | 2.00 (1.79–2.23) <sup>‡</sup>      | 1.69 (1.60–1.79) <sup>‡</sup>          |
|                             | O <sub>3</sub>                     | 1.82 (1.64–2.02) <sup>‡</sup>      | 1.56 (1.48–1.65) <sup>‡</sup>          |
|                             | PM <sub>10</sub>                   | 2.34 (2.09–2.64) <sup>‡</sup>      | 1.92 (1.81–2.04) <sup>‡</sup>          |
|                             | PM <sub>2.5</sub>                  | 2.55 (2.26–2.87) <sup>‡</sup>      | 2.02 (1.90–2.14) <sup>‡</sup>          |
|                             | SO <sub>2</sub> , O <sub>3</sub>   | 1.80 (1.61–2.01) <sup>‡</sup>      | 1.54 (1.46–1.63) <sup>‡</sup>          |
| NMHC<br>(0.09 ppm increase) | -                                  | 1.51 (1.37–1.67) <sup>‡</sup>      | 1.34 (1.27–1.41) <sup>‡</sup>          |
|                             | SO <sub>2</sub>                    | 1.49 (1.34–1.65) <sup>‡</sup>      | 1.33 (1.26–1.40) <sup>‡</sup>          |
|                             | CH <sub>4</sub>                    | 1.31 (1.19–1.44) <sup>‡</sup>      | 1.16 (1.10–1.21) <sup>‡</sup>          |
|                             | SO <sub>2</sub> , CH <sub>4</sub>  | 1.26 (1.14–1.39) <sup>‡</sup>      | 1.12 (1.07–1.18) <sup>‡</sup>          |

HR, hazard ratio; CI, confidence interval; SO<sub>2</sub>, sulfur dioxide; O<sub>3</sub>, ozone; PM<sub>10</sub>, particulate matter < 10 µm in size; PM<sub>2.5</sub>, particulate matter < 2.5 µm in size; CH<sub>4</sub>, methane.

<sup>a</sup>Additional pollutants were added into the pollutant models for multiple analysis only when the absolute value of Pearson's correlation coefficient was < 0.3.

<sup>b</sup>Cox regression models were adjusted for age, gender, essential hypertension, chronic cystitis, smoking-related diagnoses, alcohol use disorders, morbid obesity, spinal cord injury, chronic liver disease, diabetes mellitus, gout, chronic kidney disease, pesticide exposures, dyslipidemia, lag0-2, season, and ambient temperature, controlled pollutants (weak correlation with THC or NMHC).

<sup>‡</sup>p < 0.001.
